# Supplementary material for: Facile fabrication of γ-Fe2O3-nanoparticle modified N-doped porous carbon materials for the efficient hydrogenation of nitroaromatic compounds
Source: Royal Society of Chemistry journal article supplement (doi:10.1039/c7nj00636e), 2017-01-01
Supplement: c7nj00636e1.pdf [file c7nj00636e1.pdf]

**Facile fabrication of  $\gamma$ -Fe<sub>2</sub>O<sub>3</sub>-nanoparticle modified N-doped porous carbon materials for the efficient hydrogenation of nitroaromatic compounds**

*Xueliang Cui, Qiaolan Zhang, Meng Tian, Zhengping Dong\**

College of Chemistry and Chemical Engineering, Gansu Provincial Engineering Laboratory for Chemical Catalysis, Laboratory of Special Function Materials and Structure Design of the Ministry of Education, Lanzhou University, Lanzhou 730000, PR China.

E-mail: [dongzhp@lzu.edu.cn](mailto:dongzhp@lzu.edu.cn) (Zhengping Dong) Fax: +86 931 8912582; Tel: +86 931 8912577

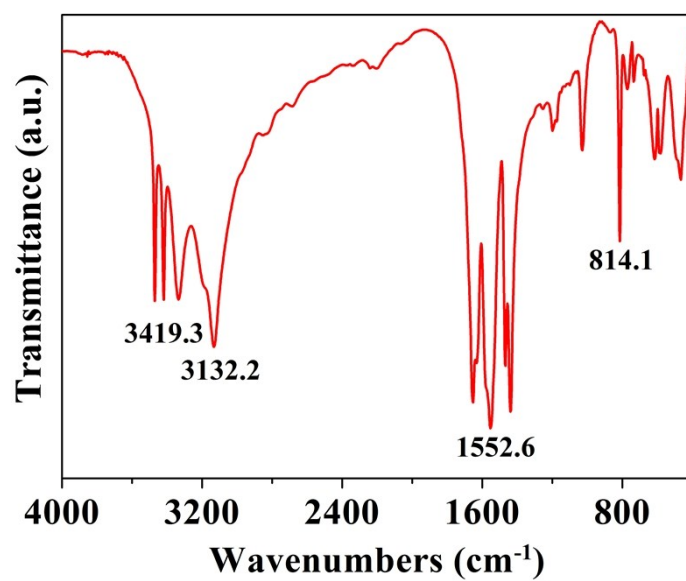

Fig. S1. The FT-IR spectrum analysis of melamine mixture.

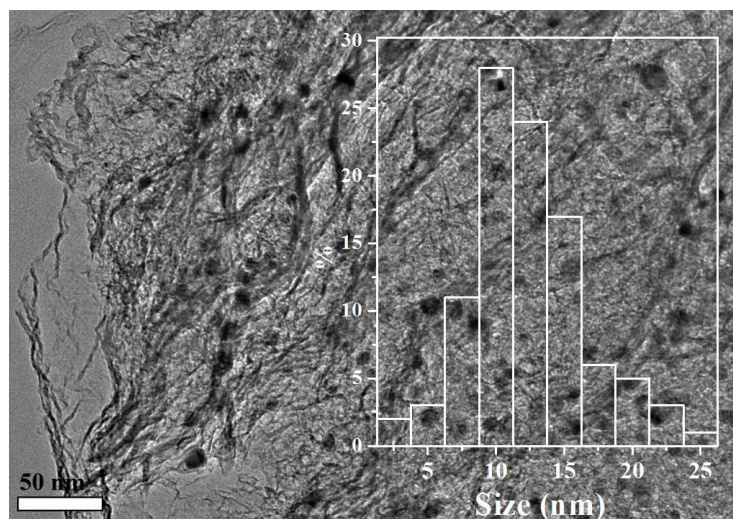

**Fig. S2.** TEM image of the reused  $\gamma\text{-Fe}_2\text{O}_3/\text{mCN-900-20}$  catalyst.

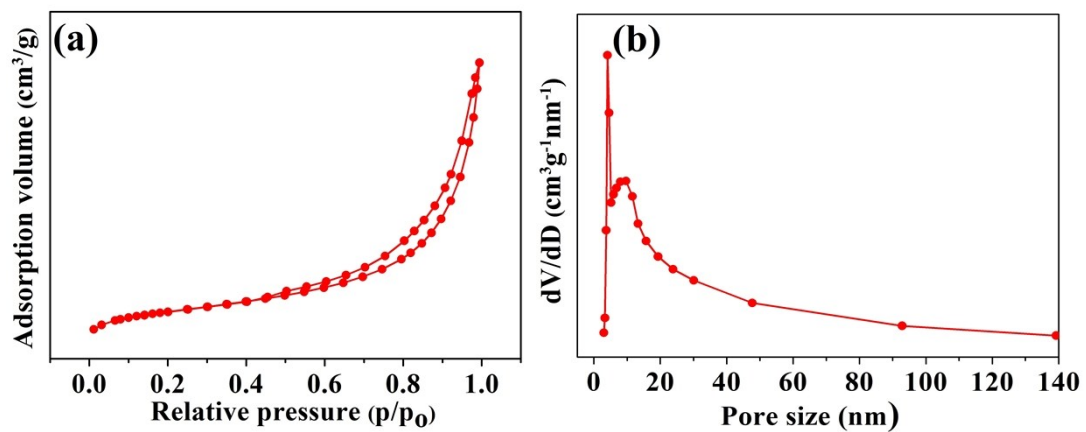

**Fig. S3.** (a) Nitrogen adsorption-desorption isotherm plots and (b) pore size distribution of the recycled  $\gamma$ -Fe<sub>2</sub>O<sub>3</sub>/mCN-900-20 catalyst.

**Table S1.** Textual properties of the prepared catalysts.

| Entry | Sample                                               | S <sub>BET</sub><br>(m <sup>2</sup> g <sup>-1</sup> ) | Pore Volume<br>(cm <sup>3</sup> g <sup>-1</sup> ) | Pore Size<br>(nm) |
|-------|------------------------------------------------------|-------------------------------------------------------|---------------------------------------------------|-------------------|
| 1     | $\gamma$ -Fe <sub>2</sub> O <sub>3</sub> /mCN-900-20 | 216.18                                                | 0.39                                              | 7.15              |
| 2     | $\gamma$ -Fe <sub>2</sub> O <sub>3</sub> /mCN-800-20 | 178.70                                                | 0.32                                              | --                |
| 3     | $\gamma$ -Fe <sub>2</sub> O <sub>3</sub> /mCN-700-20 | 107.77                                                | 0.28                                              | --                |
| 4     | $\gamma$ -Fe <sub>2</sub> O <sub>3</sub> /mCN-600-20 | 4.85                                                  | 0.02                                              | --                |
